# Supplementary material for: Genome-Wide Association Study Identifies Two Novel Regions at 11p15.5-p13 and 1p31 with Major Impact on Acute-Phase Serum Amyloid A
Source: PubMed Central journal article supplement (PMC2987930; doi:10.1371/journal.pgen.1001213), 2010-11-18
Supplement: pgen.1001213.s001.pdf [file pgen.1001213.s001.pdf]

**Table S1. List of all significantly associated SNPs of the meta-analysis**

| SNP        | chr | pos      | effect allele | other allele | beta   | se(beta) | p         | n      | I <sup>2</sup> |
|------------|-----|----------|---------------|--------------|--------|----------|-----------|--------|----------------|
| rs4150642  | 11  | 18327474 | G             | C            | 0.5012 | 0.0224   | 3.20E-111 | 4179   | 70.25          |
| rs7103375  | 11  | 18332109 | G             | A            | 0.5012 | 0.0224   | 3.26E-111 | 4179   | 70.25          |
| rs4638289  | 11  | 18242350 | A             | T            | 0.3045 | 0.0198   | 2.77E-53  | 4143   | 76.45          |
| rs4353250  | 11  | 18280093 | T             | C            | 0.2719 | 0.0180   | 1.68E-51  | 4206   | 67.88          |
| rs2061164  | 11  | 18285582 | T             | C            | 0.2722 | 0.0180   | 1.92E-51  | 4206   | 67.53          |
| rs10741739 | 11  | 18284260 | G             | T            | 0.2719 | 0.0180   | 2.27E-51  | 4210   | 68.05          |
| rs3825025  | 11  | 18300398 | C             | G            | 0.2711 | 0.0180   | 5.32E-51  | 4210   | 68.49          |
| rs4150550  | 11  | 18307474 | C             | G            | 0.2704 | 0.0180   | 9.77E-51  | 4210   | 68.34          |
| rs4150561  | 11  | 18311453 | T             | C            | 0.2697 | 0.0180   | 1.54E-50  | 4210   | 68.18          |
| rs4150562  | 11  | 18311571 | A             | G            | 0.2697 | 0.0180   | 1.58E-50  | 4210   | 68.16          |
| rs4150564  | 11  | 18311884 | G             | A            | 0.2696 | 0.0180   | 1.66E-50  | 4210   | 68.13          |
| rs4150616  | 11  | 18321690 | A             | T            | 0.2695 | 0.0180   | 1.79E-50  | 4210   | 68.02          |
| rs4150641  | 11  | 18327315 | C             | A            | 0.2695 | 0.0180   | 1.79E-50  | 4210   | 68.02          |
| rs4150650  | 11  | 18330855 | G             | A            | 0.2695 | 0.0180   | 1.79E-50  | 4210   | 68.02          |
| rs4150651  | 11  | 18331001 | T             | C            | 0.2695 | 0.0180   | 1.79E-50  | 4210   | 68.02          |
| rs4150661  | 11  | 18336205 | C             | A            | 0.2694 | 0.0180   | 1.80E-50  | 4210   | 68.01          |
| rs3740711  | 11  | 18336415 | T             | C            | 0.2694 | 0.0180   | 1.81E-50  | 4210   | 68.01          |
| rs4150612  | 11  | 18320934 | G             | T            | 0.2695 | 0.0180   | 1.82E-50  | 4210   | 68.02          |
| rs4150610  | 11  | 18320716 | A             | G            | 0.2694 | 0.0180   | 1.83E-50  | 4210   | 68.01          |
| rs4150575  | 11  | 18313042 | C             | T            | 0.2693 | 0.0180   | 2.06E-50  | 4210   | 67.99          |
| rs9783347  | 11  | 18341514 | A             | G            | 0.2692 | 0.0180   | 2.08E-50  | 4210   | 67.98          |
| rs9988866  | 11  | 18349559 | T             | A            | 0.2673 | 0.0180   | 3.68E-50  | 4210   | 68.38          |
| rs10741741 | 11  | 18298657 | T             | C            | 0.2648 | 0.0179   | 1.96E-49  | 4197   | 63.24          |
| rs1520884  | 11  | 18266276 | A             | G            | 0.2687 | 0.0182   | 3.03E-49  | 4166   | 67.39          |
| rs1993373  | 11  | 18237211 | A             | G            | 0.2860 | 0.0194   | 4.21E-49  | 4206   | 84.34          |
| rs4150615  | 11  | 18321604 | C             | T            | 0.2642 | 0.0180   | 8.49E-49  | 4208   | 65.86          |
| rs7950019  | 11  | 18235488 | G             | A            | 0.2857 | 0.0195   | 1.40E-48  | 4211   | 85.10          |
| rs7112278  | 11  | 18238492 | C             | T            | 0.2828 | 0.0193   | 2.09E-48  | 4157   | 81.62          |
| rs4150655  | 11  | 18331740 | A             | T            | 0.2669 | 0.0185   | 3.99E-47  | 4083   | 67.37          |
| rs4150622  | 11  | 18322286 | A             | G            | 0.2626 | 0.0183   | 8.67E-47  | 4187   | 69.91          |
| rs4757638  | 11  | 18269529 | G             | A            | 0.2619 | 0.0183   | 1.12E-46  | 4127   | 62.08          |
| rs4150579  | 11  | 18313756 | A             | G            | 0.2598 | 0.0182   | 2.63E-46  | 4185   | 67.39          |
| rs4150673  | 11  | 18340025 | T             | G            | 0.2528 | 0.0180   | 1.26E-44  | 4191   | 66.21          |
| rs11024614 | 11  | 18283334 | C             | T            | 0.2338 | 0.0172   | 5.05E-42  | 4205   | 59.09          |
| rs4150628  | 11  | 18322444 | G             | A            | 0.2314 | 0.0172   | 3.44E-41  | 4210   | 58.74          |
| rs4150606  | 11  | 18320145 | C             | A            | 0.2314 | 0.0172   | 3.54E-41  | 4210   | 58.73          |
| rs4757645  | 11  | 18350421 | C             | G            | 0.2284 | 0.0179   | 3.26E-37  | 4092   | 64.16          |
| rs11024613 | 11  | 18283118 | T             | C            | 0.2159 | 0.0172   | 3.74E-36  | 4178   | 55.69          |
| rs3802967  | 11  | 18300640 | T             | C            | 0.2173 | 0.0173   | 5.18E-36  | 4181   | 61.73          |
| rs2403254  | 11  | 18281722 | C             | T            | 0.2150 | 0.0172   | 6.07E-36  | 4168   | 54.32          |
| rs10832920 | 11  | 18298445 | A             | G            | 0.2154 | 0.0172   | 6.35E-36  | 4183   | 55.67          |
| rs4757637  | 11  | 18264151 | C             | A            | 0.2231 | 0.0180   | 2.10E-35  | 4177   | 72.63          |
| rs4596     | 11  | 18344704 | G             | C            | 0.2138 | 0.0172   | 2.17E-35  | 4182   | 58.32          |
| rs2037867  | 11  | 18338597 | A             | G            | 0.2137 | 0.0172   | 2.17E-35  | 4182   | 57.92          |
| rs2305564  | 11  | 18274034 | T             | A            | 0.2114 | 0.0173   | 3.76E-34  | 4152   | 60.63          |
| rs4150581  | 11  | 18313846 | A             | G            | 0.2027 | 0.0173   | 7.68E-32  | 4160   | 50.29          |
| rs10832918 | 11  | 18292260 | G             | A            | 0.2437 | 0.0238   | 1.09E-24  | 2722*  | 0.00           |
| rs3781945  | 11  | 18262848 | G             | A            | 0.1879 | 0.0194   | 3.89E-22  | 3874   | 78.09          |
| rs2896526  | 11  | 18376382 | G             | A            | 0.2211 | 0.0229   | 4.12E-22  | 4211   | 60.51          |
| rs2271997  | 11  | 18259980 | C             | T            | 0.1870 | 0.0211   | 8.67E-19  | 3213** | 84.34          |
| rs4150563  | 11  | 18311678 | T             | G            | 0.2284 | 0.0261   | 2.15E-18  | 4024   | 84.42          |
| rs12218    | 11  | 18247897 | T             | C            | 0.1650 | 0.0189   | 2.18E-18  | 4104   | 76.82          |

|            |    |          |   |   |        |        |          |        |       |
|------------|----|----------|---|---|--------|--------|----------|--------|-------|
| rs2045272  | 11 | 18234674 | T | G | 0.1582 | 0.0188 | 4.46E-17 | 4210   | 55.78 |
| rs2056781  | 11 | 18401565 | A | G | 0.2191 | 0.0266 | 1.98E-16 | 4210   | 77.72 |
| rs16935424 | 11 | 18413313 | T | A | 0.2191 | 0.0267 | 2.13E-16 | 4210   | 77.83 |
| rs16935432 | 11 | 18427063 | A | G | 0.2192 | 0.0267 | 2.28E-16 | 4210   | 77.93 |
| rs12289603 | 11 | 18427946 | C | T | 0.2193 | 0.0267 | 2.29E-16 | 4210   | 77.98 |
| rs4150667  | 11 | 18339487 | C | T | 0.2011 | 0.0245 | 2.31E-16 | 4015   | 82.93 |
| rs3740713  | 11 | 18407672 | C | A | 0.2118 | 0.0268 | 2.84E-15 | 4176   | 77.08 |
| rs7131332  | 11 | 18252099 | A | G | 0.1493 | 0.0189 | 3.22E-15 | 4115   | 39.79 |
| rs11024600 | 11 | 18252386 | T | C | 0.1468 | 0.0189 | 8.22E-15 | 4210   | 49.84 |
| rs11024603 | 11 | 18262975 | G | A | 0.1543 | 0.0215 | 8.05E-13 | 4143   | 43.30 |
| rs35593189 | 11 | 18424954 | A | G | 0.2379 | 0.0344 | 4.66E-12 | 2725*  | 33.34 |
| rs12291480 | 11 | 18262333 | G | C | 0.1446 | 0.0231 | 3.57E-10 | 4107   | 34.21 |
| rs1046615  | 11 | 18257530 | G | A | 0.1343 | 0.0226 | 2.95E-09 | 3244** | 17.62 |
| rs12416821 | 11 | 18257705 | A | G | 0.1341 | 0.0226 | 3.07E-09 | 3244** | 18.03 |
| rs12419588 | 11 | 18257706 | G | A | 0.1341 | 0.0226 | 3.07E-09 | 3244** | 18.03 |
| rs2049129  | 11 | 18261909 | T | C | 0.1340 | 0.0235 | 1.12E-08 | 4026   | 21.75 |
| rs12753193 | 1  | 65942267 | A | G | 0.1248 | 0.0184 | 1.22E-11 | 4212   | 0.00  |
| rs7541434  | 1  | 65941087 | C | A | 0.1243 | 0.0184 | 1.35E-11 | 4202   | 0.00  |
| rs7524581  | 1  | 65939087 | C | T | 0.1217 | 0.0183 | 2.82E-11 | 4206   | 0.00  |
| rs2211651  | 1  | 65928609 | G | T | 0.1132 | 0.0177 | 1.66E-10 | 4210   | 0.00  |
| rs1805096  | 1  | 65874845 | G | A | 0.1127 | 0.0177 | 1.92E-10 | 4207   | 0.00  |
| rs6588158  | 1  | 65933209 | C | T | 0.1135 | 0.0178 | 1.99E-10 | 4211   | 0.00  |
| rs4420065  | 1  | 65934049 | C | T | 0.1133 | 0.0179 | 2.23E-10 | 4212   | 0.00  |
| rs4655584  | 1  | 65928103 | T | G | 0.1123 | 0.0177 | 2.29E-10 | 4211   | 0.00  |
| rs4655585  | 1  | 65928215 | T | C | 0.1123 | 0.0177 | 2.30E-10 | 4211   | 0.00  |
| rs1938492  | 1  | 65890417 | A | C | 0.1122 | 0.0177 | 2.33E-10 | 4210   | 0.00  |
| rs2889195  | 1  | 65929318 | C | T | 0.1123 | 0.0178 | 3.00E-10 | 4181   | 0.00  |
| rs11208711 | 1  | 65920434 | G | T | 0.1114 | 0.0177 | 3.12E-10 | 4210   | 0.00  |
| rs4655582  | 1  | 65925951 | C | G | 0.1114 | 0.0177 | 3.20E-10 | 4211   | 0.00  |
| rs10789192 | 1  | 65898358 | G | A | 0.1113 | 0.0177 | 3.27E-10 | 4211   | 0.00  |
| rs12042779 | 1  | 65906538 | T | C | 0.1110 | 0.0177 | 3.65E-10 | 4210   | 0.00  |
| rs12042807 | 1  | 65906640 | T | C | 0.1110 | 0.0177 | 3.65E-10 | 4210   | 0.00  |
| rs7516341  | 1  | 65860731 | T | C | 0.1125 | 0.0180 | 4.27E-10 | 4181   | 18.00 |
| rs7531867  | 1  | 65880134 | G | A | 0.1107 | 0.0178 | 4.44E-10 | 4187   | 0.00  |
| rs10889569 | 1  | 65858782 | A | T | 0.1122 | 0.0180 | 4.71E-10 | 4183   | 20.80 |
| rs6588153  | 1  | 65864605 | T | A | 0.1181 | 0.0190 | 4.87E-10 | 4089   | 0.00  |
| rs6700896  | 1  | 65862370 | C | T | 0.1116 | 0.0180 | 5.93E-10 | 4177   | 4.96  |
| rs6678033  | 1  | 65850212 | G | A | 0.1097 | 0.0180 | 1.21E-09 | 4178   | 27.85 |
| rs1892534  | 1  | 65878532 | C | T | 0.1074 | 0.0177 | 1.33E-09 | 4206   | 0.00  |
| rs4655794  | 1  | 65931889 | T | C | 0.1018 | 0.0174 | 5.29E-09 | 4210   | 0.00  |
| rs12022410 | 1  | 65926521 | A | G | 0.1001 | 0.0174 | 9.51E-09 | 4211   | 0.00  |
| rs4655783  | 1  | 65915632 | T | C | 0.1000 | 0.0174 | 9.57E-09 | 4208   | 0.00  |
| rs11208700 | 1  | 65906031 | A | T | 0.0999 | 0.0174 | 9.84E-09 | 4208   | 0.00  |
| rs10789198 | 1  | 65975343 | G | A | 0.0991 | 0.0174 | 1.20E-08 | 4183   | 0.00  |
| rs10889576 | 1  | 65941154 | C | T | 0.1256 | 0.0221 | 1.31E-08 | 4197   | 0.00  |
| rs4288572  | 1  | 65973610 | G | A | 0.0988 | 0.0174 | 1.33E-08 | 4184   | 0.00  |
| rs11208728 | 1  | 65985631 | A | G | 0.0985 | 0.0174 | 1.48E-08 | 4182   | 0.00  |
| rs4655800  | 1  | 65984279 | A | G | 0.0991 | 0.0175 | 1.54E-08 | 4167   | 0.00  |
| rs6696954  | 1  | 65827583 | T | G | 0.1057 | 0.0187 | 1.56E-08 | 4192   | 0.00  |
| rs17407727 | 1  | 65944594 | A | C | 0.1038 | 0.0184 | 1.80E-08 | 4197   | 50.67 |
| rs4425959  | 1  | 65940407 | A | G | 0.1242 | 0.0221 | 2.02E-08 | 4194   | 0.00  |
| rs17416194 | 1  | 65943780 | A | G | 0.1035 | 0.0186 | 2.50E-08 | 4164   | 48.62 |
| rs4278348  | 1  | 65947983 | T | C | 0.0947 | 0.0172 | 3.54E-08 | 4209   | 34.48 |
| rs7532805  | 1  | 65955718 | G | A | 0.0939 | 0.0172 | 4.64E-08 | 4208   | 35.69 |

\* only KORA S4 and LURIC \*\* only KORA S4, LURIC, and TwinsUK
