# Supplementary material for: Genome-Wide Association Study Identifies Two Novel Regions at 11p15.5-p13 and 1p31 with Major Impact on Acute-Phase Serum Amyloid A
Source: PubMed Central journal article supplement (PMC2987930; doi:10.1371/journal.pgen.1001213), 2010-11-18
Supplement: pgen.1001213.s005.pdf [file pgen.1001213.s005.pdf]

**Table S5. Results of the validation analyses**

| region                    | SNP        | effect allele | other allele | effect allele freq | n    | beta  | se(beta) | p        |
|---------------------------|------------|---------------|--------------|--------------------|------|-------|----------|----------|
| 11p15.5-p13 locus         | rs4150642  | G             | C            | 0.217              | 2082 | 0.473 | 0.029    | 7.41E-58 |
|                           | rs7103375  | G             | A            | 0.215              | 2130 | 0.460 | 0.028    | 2.27E-56 |
| SAA1 subregion            | rs4638289  | A             | T            | 0.332              | 2091 | 0.292 | 0.025    | 1.61E-30 |
|                           | rs1993373  | A             | G            | 0.327              | 1939 | 0.297 | 0.026    | 2.04E-29 |
|                           | rs2045272  | T             | G            | 0.581              | 2118 | 0.207 | 0.024    | 4.09E-17 |
| HPS5/ GTF2H1 subregion    | rs4353250  | T             | C            | 0.352              | 2125 | 0.345 | 0.025    | 5.82E-42 |
|                           | rs9988866  | T             | A            | 0.359              | 2125 | 0.355 | 0.025    | 6.62E-45 |
|                           | rs1520884  | T             | C            | 0.356              | 2034 | 0.318 | 0.024    | 9.14E-38 |
|                           | rs4150655  | A             | T            | 0.323              | 2123 | 0.343 | 0.025    | 1.52E-41 |
|                           | rs4757637  | C             | A            | 0.406              | 2109 | 0.286 | 0.025    | 1.48E-29 |
|                           | rs4150581  | A             | G            | 0.486              | 2072 | 0.250 | 0.024    | 9.31E-25 |
|                           | rs11024603 | G             | A            | 0.828              | 2127 | 0.058 | 0.031    | 5.74E-02 |
| LDHA/LDHC subregion       | rs2896526  | G             | A            | 0.187              | 2097 | 0.216 | 0.031    | 8.18E-12 |
|                           | rs2056781  | T             | C            | 0.170              | 1942 | 0.157 | 0.032    | 1.17E-06 |
|                           | rs12289603 | C             | T            | 0.120              | 2131 | 0.219 | 0.034    | 1.69E-10 |
|                           | rs3740713  | G             | T            | 0.109              | 2117 | 0.188 | 0.036    | 1.67E-07 |
|                           | rs35593189 | A             | G            | 0.116              | 2113 | 0.213 | 0.035    | 1.11E-09 |
| 1p31 locus (LEPR)         | rs12753193 | A             | G            | 0.606              | 2127 | 0.085 | 0.025    | 8.60E-04 |
|                           | rs7524581  | C             | T            | 0.624              | 2123 | 0.080 | 0.026    | 1.85E-03 |
|                           | rs2211651  | G             | T            | 0.591              | 2079 | 0.069 | 0.025    | 6.89E-03 |
|                           | rs2889195  | C             | T            | 0.603              | 2116 | 0.075 | 0.025    | 2.94E-03 |
|                           | rs1892534  | G             | A            | 0.627              | 2090 | 0.070 | 0.025    | 5.39E-03 |
|                           | rs12022410 | A             | G            | 0.410              | 2089 | 0.072 | 0.026    | 5.32E-03 |
|                           | rs17407727 | A             | C            | 0.288              | 2085 | 0.067 | 0.027    | 1.55E-02 |
|                           | rs17416194 | A             | G            | 0.278              | 2063 | 0.055 | 0.027    | 4.20E-02 |
| 11p14 locus (SERGEF)males | rs493767   | C             | G            | 0.349              | 1049 | 0.091 | 0.035    | 8.50E-03 |
|                           | rs550659   | G             | A            | 0.373              | 1041 | 0.084 | 0.035    | 1.65E-02 |
