# Supplementary material for: Genome-Wide Association Study Identifies Two Novel Regions at 11p15.5-p13 and 1p31 with Major Impact on Acute-Phase Serum Amyloid A
Source: PLoS Genet. 2010 Nov 18;6(11):e1001213. doi: 10.1371/journal.pgen.1001213 (PMC2987930; doi:10.1371/journal.pgen.1001213)
Supplement: Table S4 — Analysis of the structure of the chromosome 11 region. (0.04 MB PDF) [file pgen.1001213.s004.pdf]

**Table S4. Analysis of the structure of the chromosome 11 region**

|                                                     |                                            | Single SNP model            |                         | Multiple SNP model            |                         |
|-----------------------------------------------------|--------------------------------------------|-----------------------------|-------------------------|-------------------------------|-------------------------|
| <b>rs4150642</b><br>11p15.5-p13                     | <b>beta</b><br><b>se(beta)</b><br><b>p</b> | 0.501<br>0.022<br>3.20E-111 | $\Delta R^2 = 0.1084^*$ |                               |                         |
| <b>rs4638289</b><br>SAA1 subregion                  | <b>beta</b><br><b>se(beta)</b><br><b>p</b> | 0.305<br>0.020<br>2.77E-53  | $\Delta R^2 = 0.0557^*$ | 0.254*<br>0.024*<br>7.61E-27* |                         |
| <b>rs4353250</b><br><i>HPS5/GTF2H1</i><br>subregion | <b>beta</b><br><b>se(beta)</b><br><b>p</b> | 0.272<br>0.018<br>1.68E-51  | $\Delta R^2 = 0.0534^*$ | 0.212*<br>0.022*<br>3.64E-22* |                         |
| <b>rs2896526</b><br><i>LDHA/LDHC</i><br>subregion   | <b>beta</b><br><b>se(beta)</b><br><b>p</b> | 0.221<br>0.023<br>4.12E-22  | $\Delta R^2 = 0.0237^*$ | 0.106*<br>0.025*<br>1.81E-05* | $\Delta R^2 = 0.0910^*$ |

\* Values calculated for KORA S4, LURIC, and the Sorbs.
