# Supplementary material for: Genome-Wide Association Study Identifies Two Novel Regions at 11p15.5-p13 and 1p31 with Major Impact on Acute-Phase Serum Amyloid A
Source: PLoS Genet. 2010 Nov 18;6(11):e1001213. doi: 10.1371/journal.pgen.1001213 (PMC2987930; doi:10.1371/journal.pgen.1001213)
Supplement: Table S6 — Study characteristics of the four studies of the meta-analysis and the validation sample. (0.04 MB PDF) [file pgen.1001213.s006.pdf]

**Table S6. Study characteristics of the four studies of the meta-analysis and the validation sample**

| <b>study</b>                              | <b>KORA S4</b> | <b>LURIC</b>  | <b>Sorbs</b>  | <b>TwinsUK</b> | <b>validation sample</b> |
|-------------------------------------------|----------------|---------------|---------------|----------------|--------------------------|
| <b>N</b> all (males/females)              | 1785 (874/911) | 961 (693/268) | 883 (361/522) | 583 (0/583)    | 2136 (1069/1067)         |
| <b>Age</b> mean [years] (sd)              | 53.91 (8.87)   | 64.14 (10.80) | 47.89 (16.31) | 56.74 (10.39)  | 45.66 (15.76)            |
| <b>BMI</b> mean [kg/m <sup>2</sup> ] (sd) | 27.72 (4.55)   | 26.53 (4.52)  | 27.05 (4.94)  | 24.67 (4.03)   | 26.87 (4.75)             |
| <b>SAA</b> geometric mean [mg/l]          | 3.35           | 6.61          | 3.09          | 5.61           | 3.10                     |
